# Supplementary material for: Practical multidisciplinary framework for the assessment and management of patients with unexplained chronic aerodigestive symptoms
Source: PubMed Central journal article supplement — BMJ Open Gastroenterol. 2023 Nov 23;10(1):e000883. doi: 10.1136/bmjgast-2022-000883 (PMC10668155; doi:10.1136/bmjgast-2022-000883), 2023-11-23
Supplement: bmjgast-2022-000883supp001.pdf [file bmjgast-2022-000883supp001.pdf]

**Supplemental Table: Evidence-base for therapies for unexplained chronic throat symptoms**

| <b>Treatment options</b>                                                                                                    | <b>Indications</b>                                 | <b>Treatment details</b>                                                                                                               | <b>Evidence in UCTS</b>                                                                 | <b>Recommendations</b>                                                                                                                                                                                                                                                                                                            |
|-----------------------------------------------------------------------------------------------------------------------------|----------------------------------------------------|----------------------------------------------------------------------------------------------------------------------------------------|-----------------------------------------------------------------------------------------|-----------------------------------------------------------------------------------------------------------------------------------------------------------------------------------------------------------------------------------------------------------------------------------------------------------------------------------|
| <b>Standard interventions</b>                                                                                               |                                                    |                                                                                                                                        |                                                                                         |                                                                                                                                                                                                                                                                                                                                   |
| Education and reassurance                                                                                                   | All patients                                       | Education on ITS and multi-factorial nature, prevalence, symptom validation, reassurance re benign nature of symptoms, establish goals | No data                                                                                 | We suggest these strategies form the standard foundation of treatment in all patients, to support patient engagement and optimise aerodigestive health. Initial speech therapy review can seek to reinforce vocal hygiene and health, and initiate tactics to minimise phonotraumatic symptoms as the treatment plan is developed |
| Minimise intake of carbonated beverages and high acid content food / liquids                                                | All patients                                       | Educational materials and counselling                                                                                                  | Minimal data. Weak evidence to support symptom benefit on UCTS <sup>1-3</sup>           |                                                                                                                                                                                                                                                                                                                                   |
| Ensure sufficient oral hydration                                                                                            | All patients                                       | Education materials and counselling                                                                                                    | Moderate evidence for epithelial barrier integrity and symptom benefits <sup>4-6</sup>  |                                                                                                                                                                                                                                                                                                                                   |
| Vocal hygiene education                                                                                                     | All patients (particularly those with dysphonia)   | Educational materials and counselling, initial speech therapy review                                                                   | Moderate evidence for minimising laryngeal irritation and symptoms <sup>7-9</sup>       |                                                                                                                                                                                                                                                                                                                                   |
| <b>Dietary interventions</b>                                                                                                |                                                    |                                                                                                                                        |                                                                                         |                                                                                                                                                                                                                                                                                                                                   |
| Elevate head /torso during sleep<br>Avoid eating within 3 hours of sleep<br>Avoid excess caffeine, alcohol, processed foods | Suspected or known GORD<br>Patients with dysphagia | Provide educational materials and counselling or consider dietician review and education                                               | Moderate-strong evidence supports dietary and lifestyle interventions for management of | In patients with known or suspected GORD, these are safe and simple strategies to implement and are therefore recommended in combination with standard measures, and pharmacological                                                                                                                                              |

|                                                     |                                                                   |                                                                                                       |                                                                                                                                                   |                                                                                                                                                                                                                                                                           |
|-----------------------------------------------------|-------------------------------------------------------------------|-------------------------------------------------------------------------------------------------------|---------------------------------------------------------------------------------------------------------------------------------------------------|---------------------------------------------------------------------------------------------------------------------------------------------------------------------------------------------------------------------------------------------------------------------------|
| Control meal portions, mindful chewing / swallowing |                                                                   |                                                                                                       | oesophageal symptoms of GORD. Their efficacy for presumed LPR is not well established <sup>2 10 11</sup>                                          | therapies where indicated                                                                                                                                                                                                                                                 |
| <b>Psychosocial interventions</b>                   |                                                                   |                                                                                                       |                                                                                                                                                   |                                                                                                                                                                                                                                                                           |
| Mindfulness and meditation therapies                | Co-morbid anxiety and depression                                  | Counsel patient on purpose of treatments, potential benefits, mind-body link                          | Moderate, limited evidence suggests therapies supporting mental wellness and mindfulness improve symptoms in patients with UCTS. <sup>12-26</sup> | Mindfulness and meditation practices, in addition to regular exercise, have numerous reported benefits and health and wellness and may be recommended to any patient with UCTS. Approach with sensitivity and consent.                                                    |
| Exercise                                            | Suspected symptom hyper vigilance                                 | Educational materials and Link patient with resources and local providers                             |                                                                                                                                                   | Specific psychotherapy or behavioural therapies may be useful tools in patients with co-morbid mental illness or significant stressors, or recalcitrant symptoms, and should involve referral to a psychologist or other mental health professional with patient consent. |
| Acceptance and Commitment therapies                 | Prominent psychosocial stressors                                  | Refer to psychologist or other mental health provider where appropriate                               |                                                                                                                                                   |                                                                                                                                                                                                                                                                           |
| Cognitive Behavioural Therapy                       | Muscle tension or vocal fold movement disorders                   |                                                                                                       |                                                                                                                                                   |                                                                                                                                                                                                                                                                           |
| Hypnotherapy                                        | Muscle tension or vocal fold movement disorders                   |                                                                                                       |                                                                                                                                                   |                                                                                                                                                                                                                                                                           |
| Patient support groups                              |                                                                   |                                                                                                       |                                                                                                                                                   |                                                                                                                                                                                                                                                                           |
| Exercise                                            | Muscle tension or vocal fold movement disorders                   |                                                                                                       |                                                                                                                                                   |                                                                                                                                                                                                                                                                           |
| <b>Environmental modifications</b>                  |                                                                   |                                                                                                       |                                                                                                                                                   |                                                                                                                                                                                                                                                                           |
| Occupational and domestic modifications             | Suspected inhaled irritant or allergy<br>Professional voice users | Alterations in workplace/domestic activity or environment, or PPE use to minimise potential exposures | Limited data for evidence of benefit in workplace associated laryngitis                                                                           | Avoidance of the suspected irritant is ideal. Appropriate PPE may be necessary, though consideration of increased vocal effort                                                                                                                                            |

|                          |                                                             |                                                                                                                                |                                                                                                             |                                                                                                                                                                                         |
|--------------------------|-------------------------------------------------------------|--------------------------------------------------------------------------------------------------------------------------------|-------------------------------------------------------------------------------------------------------------|-----------------------------------------------------------------------------------------------------------------------------------------------------------------------------------------|
|                          |                                                             |                                                                                                                                | syndromes <sup>27-30</sup>                                                                                  | and airway dehydration associated with mask use must be considered<br>Occupational physicians may be able to confirm irritant reactivity and initiate additional therapeutic strategies |
|                          |                                                             | Change in work activities to reduce vocal load                                                                                 | Weak-Moderate evidence of benefit for dysphonia in professional voice users <sup>30-32</sup>                | Vocal demand should, where possible, be reduced in patients with symptoms suspected to be related to high voice use                                                                     |
| <b>Speech Therapy</b>    |                                                             |                                                                                                                                |                                                                                                             |                                                                                                                                                                                         |
| Various interventions    | All patients                                                | Vocal hygiene, vocal retraining, behavioural modification, symptom mindfulness, swallow retraining, relaxation techniques etc. | Moderate-strong evidence supports benefit from speech therapy for a variety of UCTS <sup>7 9 13 33-41</sup> | All patients should be referred to speech therapy for assessment, education and specific therapies guided by symptoms, nasoendoscopic features and patient factors                      |
| <b>Reflux treatments</b> |                                                             |                                                                                                                                |                                                                                                             |                                                                                                                                                                                         |
| Alginates                | Patients with confirmed or suspected GORD                   | Oral alginate suspension (Gaviscon DA) 10-20mL post meals and pre bedtime                                                      | Weak-moderate evidence of benefit in patients with GORD associated UCTS <sup>42-45</sup>                    | Safe, recommended in all patients with suspected LPR                                                                                                                                    |
| PPIs                     | Patients with oesophageal symptoms of GORD or confirmed PPI | Pantoprazole 40mg BD or esomeprazole 40mg BD for 12 weeks*                                                                     | Strong evidence for oesophageal symptoms of GORD, weak                                                      | Acid suppression therapies appear minimally effective for UCTS based on pooled data from randomised trials.                                                                             |

|                          |                                                                                |                                                                              |                                                                                |                                                                                                                                                                                                                                                                                           |
|--------------------------|--------------------------------------------------------------------------------|------------------------------------------------------------------------------|--------------------------------------------------------------------------------|-------------------------------------------------------------------------------------------------------------------------------------------------------------------------------------------------------------------------------------------------------------------------------------------|
|                          | responsive GORD                                                                |                                                                              | evidence for UCTS <sup>1 46-50</sup>                                           | Use only to control oesophageal symptoms. Use beyond this based on pH impedance data or other factors should be under the guidance of a gastroenterologist                                                                                                                                |
| H2 antagonists           | Patients with oesophageal symptoms of GORD or confirmed PPI responsive GORD    | H2 receptor antagonist daily (i.e. Nizatidine)                               | Strong evidence for oesophageal symptoms of GORD, limited data for UCTS        | As above                                                                                                                                                                                                                                                                                  |
| Prokinetics              | Not indicated                                                                  | Not indicated                                                                | No evidence                                                                    | Not recommended                                                                                                                                                                                                                                                                           |
| <b>Allergy treatment</b> |                                                                                |                                                                              |                                                                                |                                                                                                                                                                                                                                                                                           |
| Oral antihistamines      | Co-morbid respiratory allergy or demonstrated sensitivity to inhaled allergens | Loratadine 10mg daily for 4 weeks<br>OR<br>Cetirizine 10mg daily for 4 weeks | Weak evidence of benefit for patients with UCTS and AR <sup>51-56</sup>        | The use of allergy treatments for UCTS has been minimally studied.<br>In patients with previously undetected allergy, a trial of leukotriene antagonist +/- oral antihistamine is reasonable until further dedicated data is available to guide recommendations.                          |
| Leukotriene antagonists  | Co-morbid respiratory allergy or demonstrated sensitivity to inhaled allergens | Montelukast                                                                  | Weak evidence of benefit for patients with UCTS and AR <sup>55-61</sup>        | In patients with Asthma or AR, optimise control of these conditions, and consider trial of additional agents to assess impact on UCTS.                                                                                                                                                    |
| Immunotherapy            | Steroid inhaler dependent asthma<br>Severe AR                                  | Refer to immunology for opinion and treatment initiation / supervision       | Weak evidence of benefit for patients with UCTS and Asthma <sup>53 62 63</sup> | In patients with Asthma or AR, optimise control of these conditions, and consider trial of additional agents to assess impact on UCTS.<br>Use of steroid inhalers is associated with dysphonia and should be considered a potential symptom precipitant.<br>Immunotherapy may be a useful |

consideration in this case.

### Neuromodulators

|               |               |                                                                                                                                              |                                                                                                                         |                                                                                                                                                                                                                                                                                                                                                                                                                                                                                                                  |
|---------------|---------------|----------------------------------------------------------------------------------------------------------------------------------------------|-------------------------------------------------------------------------------------------------------------------------|------------------------------------------------------------------------------------------------------------------------------------------------------------------------------------------------------------------------------------------------------------------------------------------------------------------------------------------------------------------------------------------------------------------------------------------------------------------------------------------------------------------|
| Gabapentin    | All patients* | 300mg daily, titrated every 1-2 weeks to a maximum of 1200mg daily. Cease if no benefit after 6 weeks or adverse effects outweighing benefit | Moderate evidence of benefit for UCTS, particularly globus sensation, chronic cough and dysphonia <sup>9 39 64-67</sup> | A 4-6 week trial of neuromodulating therapies is reasonable for patients with recalcitrant symptoms, or where sensory dysregulation or hyper-vigilance is strongly suspected. May also be beneficial in some patients with aerodigestive motor tension or movement aberrations. Psychosomatic stressors or co-morbidity may be a relative indicator, but this requires further investigation. Ensure no contraindication to treatment and adequate monitoring for adverse effects. Informed consent is required. |
| Amitriptyline |               | 10mg nocte titrated to a maximum of 40mg nocte . Cease if no benefit after 6 weeks or adverse effects outweighing benefit                    | Moderate evidence of benefit for UCTS, particularly globus sensation, chronic cough and dysphonia <sup>38 67-70</sup>   |                                                                                                                                                                                                                                                                                                                                                                                                                                                                                                                  |

### Invasive treatments

|                  |                              |                                                         |                                                                                                              |                                                                                                                                                                                                                                        |
|------------------|------------------------------|---------------------------------------------------------|--------------------------------------------------------------------------------------------------------------|----------------------------------------------------------------------------------------------------------------------------------------------------------------------------------------------------------------------------------------|
| Botox injections | Dysphonia<br>Globus<br>Cough | Specific injection targets depending on symptom profile | Limited-moderate evidence of benefits for sensory and motor dysfunction related symptoms <sup>38 71-75</sup> | Botox injections may be of value in specific instances, depending on patient factors, symptoms, and specific factors on naso-endoscopy, manometry or functional swallow assessments. Refer to an otolaryngologist for consideration in |
|------------------|------------------------------|---------------------------------------------------------|--------------------------------------------------------------------------------------------------------------|----------------------------------------------------------------------------------------------------------------------------------------------------------------------------------------------------------------------------------------|

|                     |                                                   |                                    |                                                                           |                                                                                                                                                                                                               |
|---------------------|---------------------------------------------------|------------------------------------|---------------------------------------------------------------------------|---------------------------------------------------------------------------------------------------------------------------------------------------------------------------------------------------------------|
| Anti-reflux surgery | Objective reflux burden and recalcitrant symptoms | Surgical fundoplication or similar | Moderate evidence for benefit in GORD associated UCTS <sup>47 76-83</sup> | patients with recalcitrant symptoms<br>Reserve for patients with high reflux burden and morbid symptoms. Limited utility of pH-Impedance data for predicting symptom response. Refer to UGI for consideration |
|---------------------|---------------------------------------------------|------------------------------------|---------------------------------------------------------------------------|---------------------------------------------------------------------------------------------------------------------------------------------------------------------------------------------------------------|

### References

1. Lechien JR, Saussez S, Schindler A, et al. Clinical outcomes of laryngopharyngeal reflux treatment: A systematic review and meta-analysis. *Laryngoscope* 2019;129(5):1174-87. doi: 10.1002/lary.27591 [published Online First: 2019/01/01]
2. Koufman JA. Low-acid diet for recalcitrant laryngopharyngeal reflux: therapeutic benefits and their implications. *Ann Otol Rhinol Laryngol* 2011;120(5):281-7. doi: 10.1177/000348941112000501 [published Online First: 2011/06/17]
3. Martinucci I, de Bortoli N, Savarino E, et al. Optimal treatment of laryngopharyngeal reflux disease. *Ther Adv Chronic Dis* 2013;4(6):287-301. doi: 10.1177/2040622313503485 [published Online First: 2013/11/02]
4. Santana É R, Masson MLV, Araújo TM. The Effect of Surface Hydration on Teachers' Voice Quality: An Intervention Study. *J Voice* 2017;31(3):383.e5-83.e11. doi: 10.1016/j.jvoice.2016.08.019 [published Online First: 20161017]
5. Baijens LW, Clavé P, Cras P, et al. European Society for Swallowing Disorders - European Union Geriatric Medicine Society white paper: oropharyngeal dysphagia as a geriatric syndrome. *Clin Interv Aging* 2016;11:1403-28. doi: 10.2147/cia.S107750 [published Online First: 20161007]
6. García Real T, García Real A, Díaz Román T, et al. [The outcome of hydration in functional dysphonia]. *An Otorrinolaringol Ibero Am* 2002;29(4):377-91.
7. Behrman A, Rutledge J, Hembree A, et al. Vocal hygiene education, voice production therapy, and the role of patient adherence: a treatment effectiveness study in women with phonotrauma. *J Speech Lang Hear Res* 2008;51(2):350-66. doi: 10.1044/1092-4388(2008)026
8. Vertigan AE, Gibson PG. Chronic refractory cough as a sensory neuropathy: evidence from a reinterpretation of cough triggers. *J Voice* 2011;25(5):596-601. doi: 10.1016/j.jvoice.2010.07.009 [published Online First: 2010/11/06]
9. Gibson PG, Vertigan AE. Management of chronic refractory cough. *Bmj* 2015;351:h5590. doi: 10.1136/bmj.h5590 [published Online First: 20151214]
10. Tierney WS, Gabbard SL, Milstein CF, et al. Treatment of laryngopharyngeal reflux using a sleep positioning device: A prospective cohort study. *Am J Otolaryngol* 2017;38(5):603-07. doi: 10.1016/j.amjoto.2017.06.012 [published Online First: 2017/07/10]
11. Zalvan CH, Hu S, Greenberg B, et al. A Comparison of Alkaline Water and Mediterranean Diet versus Proton Pump Inhibition for Treatment of Laryngopharyngeal Reflux. *JAMA Otolaryngology-Head & Neck Surgery* 2017;143(10):1023-29. doi: 10.1001/jamaoto.2017.1454
12. Pooviprom N, Ratta-apha W, Maneerattanaporn M, et al. Treatment outcomes in patients with globus: A randomized control trial of psychoeducation, neuromodulators, and proton pump inhibitors. *Neurogastroenterology & Motility* 2023;35(3):e14500. doi: <https://doi.org/10.1111/nmo.14500>
13. Lee BE, Kim GH. Globus pharyngeus: a review of its etiology, diagnosis and treatment. *World J Gastroenterol* 2012;18(20):2462-71. doi: 10.3748/wjg.v18.i20.2462

14. Gale CR, Wilson JA, Deary IJ. Globus Sensation and Psychopathology in Men: The Vietnam Experience Study. *Psychosomatic Medicine* 2009;71(9)
15. Manabe N, Tsutsui H, Kusunoki H, et al. Pathophysiology and treatment of patients with globus sensation--from the viewpoint of esophageal motility dysfunction. *J Smooth Muscle Res* 2014;50:66-77. doi: 10.1540/jsmr.50.66
16. Chung KF, McGarvey L, Mazzone SB. Chronic cough as a neuropathic disorder. *The Lancet Respiratory Medicine* 2013;1(5):414-22. doi: 10.1016/S2213-2600(13)70043-2
17. Kiebles JL, Kwiatek MA, Pandolfino JE, et al. Do patients with globus sensation respond to hypnotically assisted relaxation therapy? A case series report. *Dis Esophagus* 2010;23(7):545-53. doi: 10.1111/j.1442-2050.2010.01064.x [published Online First: 20100504]
18. French CL, Crawford SL, Bova C, et al. Change in Psychological, Physiological, and Situational Factors in Adults After Treatment of Chronic Cough. *CHEST* 2017;152(3):547-62. doi: 10.1016/j.chest.2017.06.024
19. Pastar Z, Lipozencić J. Adverse reactions to food and clinical expressions of food allergy. *Skinmed* 2006;5(3):119-25; quiz 26-7. doi: 10.1111/j.1540-9740.2006.04913.x
20. Janssens T, Silva M, Davenport PW, et al. Attentional Modulation of Reflex Cough. *CHEST* 2014;146(1):135-41. doi: 10.1378/chest.13-2536
21. Soni RS, Ebersole B, Jamal N. Treatment of Chronic Cough: Single-Institution Experience Utilizing Behavioral Therapy. *Otolaryngology–Head and Neck Surgery* 2017;156(1):103-08. doi: <https://doi.org/10.1177/0194599816675299>
22. Irwin RS, Glomb WB, Chang AB. Habit Cough, Tic Cough, and Psychogenic Cough in Adult and Pediatric Populations: ACCP Evidence-Based Clinical Practice Guidelines. *CHEST* 2006;129(1):174S-79S. doi: 10.1378/chest.129.1\_suppl.174S
23. Verdonshot RJCG, Baijens LWJ, Vanbelle S, et al. Affective symptoms in patients with oropharyngeal dysphagia: A systematic review. *Journal of Psychosomatic Research* 2017;97:102-10. doi: <https://doi.org/10.1016/j.jpsychores.2017.04.006>
24. Speyer R, Cordier R, Sutt A-L, et al. Behavioural Interventions in People with Oropharyngeal Dysphagia: A Systematic Review and Meta-Analysis of Randomised Clinical Trials. *Journal of Clinical Medicine* 2022; 11(3).
25. Vasant DH, Whorwell PJ. Gut-focused hypnotherapy for functional gastrointestinal disorders: Evidence-base, practical aspects, and the Manchester protocol. *Neurogastroenterology & Motility* 2019;31(8):e13573.
26. Kiebles J, Kwiatek M, Pandolfino J, et al. Do patients with globus sensation respond to hypnotically assisted relaxation therapy? A case series report. *Diseases of the Esophagus* 2010;23(7):545-53.
27. Franzese CB. AAOA allergy primer: history and physical examination. *Int Forum Allergy Rhinol* 2014;4 Suppl 2:S28-31. doi: 10.1002/alr.21390
28. Moscato G, Pala G, Cullinan P, et al. EAACI Position Paper on assessment of cough in the workplace. *Allergy* 2014;69(3):292-304. doi: <https://doi.org/10.1111/all.12352>
29. Tarlo SM, Altman KW, Oppenheimer J, et al. Occupational and Environmental Contributions to Chronic Cough in Adults: Chest Expert Panel Report. *Chest* 2016;150(4):894-907. doi: <https://doi.org/10.1016/j.chest.2016.07.029>
30. Assunção AÁ, Bassi IB, de Medeiros AM, et al. Occupational and individual risk factors for dysphonia in teachers. *Occupational Medicine* 2012;62(7):553-59. doi: 10.1093/occmed/kqs145
31. de Oliveira Lemos I, da Cunha Pereira G, Druck SantAnna G, et al. Effects of a Voice Therapy Program for Patients with Muscle Tension Dysphonia. *Folia Phoniatrica et Logopaedica* 2018;69(5-6):239-45. doi: 10.1159/000487942
32. Gama ACC, Santos JN, Pedra EdFP, et al. Dose vocal em professores: correlação com a presença de disfonia. *CoDAS* 2016;28
33. Vertigan AE, Theodoros DG, Gibson PG, et al. Efficacy of speech pathology management for chronic cough: a randomised placebo controlled trial of treatment efficacy. *Thorax* 2006;61(12):1065. doi: 10.1136/thx.2006.064337
34. Vertigan AE, Gibson PG, Theodoros DG, et al. The role of sensory dysfunction in the development of voice disorders, chronic cough and paradoxical vocal fold movement.

- International Journal of Speech-Language Pathology* 2008;10(4):231-44. doi: 10.1080/17549500801932089
35. Ryan NM, Gibson PG. Characterization of laryngeal dysfunction in chronic persistent cough. *Laryngoscope* 2009;119(4):640-5. doi: 10.1002/lary.20114
  36. Denton E, Hoy R. Occupational aspects of irritable larynx syndrome. *Curr Opin Allergy Clin Immunol* 2020;20(2):90-95. doi: 10.1097/aci.0000000000000619
  37. Baudelet M, Van den Steen L, Duprez F, et al. Study protocol for a randomized controlled trial: prophylactic swallowing exercises in head-and-neck cancer patients treated with (chemo)radiotherapy (PRESTO trial). *Trials* 2020;21(1):237. doi: 10.1186/s13063-020-4171-0 [published Online First: 20200302]
  38. Mahoney J, Hew M, Vertigan A, et al. Treatment effectiveness for Vocal Cord Dysfunction in adults and adolescents: A systematic review. *Clin Exp Allergy* 2022;52(3):387-404. doi: 10.1111/cea.14036 [published Online First: 20211104]
  39. Ryan NM, Vertigan AE, Birring SS. An update and systematic review on drug therapies for the treatment of refractory chronic cough. *Expert Opin Pharmacother* 2018;19(7):687-711. doi: 10.1080/14656566.2018.1462795 [published Online First: 2018/04/17]
  40. Ruotsalainen J, Sellman J, Lehto L, et al. Systematic review of the treatment of functional dysphonia and prevention of voice disorders. *Otolaryngol Head Neck Surg* 2008;138(5):557-65. doi: 10.1016/j.otohns.2008.01.014
  41. da Cunha Pereira G, de Oliveira Lemos I, Dalbosco Gadenz C, et al. Effects of Voice Therapy on Muscle Tension Dysphonia: A Systematic Literature Review. *Journal of Voice* 2018;32(5):546-52. doi: 10.1016/j.jvoice.2017.06.015
  42. Bor S, Kalkan İ H, Çelebi A, et al. Alginates: From the ocean to gastroesophageal reflux disease treatment. *Turk J Gastroenterol* 2019;30(Suppl2):109-36. doi: 10.5152/tjg.2019.19677 [published Online First: 2019/10/19]
  43. Bardhan KD, Strugala V, Dettmar PW. Reflux revisited: advancing the role of pepsin. *Int J Otolaryngol* 2012;2012:646901. doi: 10.1155/2012/646901 [published Online First: 2012/01/14]
  44. Krause AJ, Walsh EH, Weissbrod PA, et al. An update on current treatment strategies for laryngopharyngeal reflux symptoms. *Ann N Y Acad Sci* 2022;1510(1):5-17. doi: 10.1111/nyas.14728
  45. McGlashan JA, Johnstone LM, Sykes J, et al. The value of a liquid alginate suspension (Gaviscon Advance) in the management of laryngopharyngeal reflux. *Eur Arch Otorhinolaryngol* 2009;266(2):243-51. doi: 10.1007/s00405-008-0708-7 [published Online First: 2008/05/29]
  46. Vaezi MF, Katzka D, Zerbib F. Extraesophageal Symptoms and Diseases Attributed to GERD: Where is the Pendulum Swinging Now? *Clin Gastroenterol Hepatol* 2018;16(7):1018-29. doi: 10.1016/j.cgh.2018.02.001 [published Online First: 20180207]
  47. Zhang C, Hu ZW, Yan C, et al. Nissen fundoplication vs proton pump inhibitors for laryngopharyngeal reflux based on pH-monitoring and symptom-scale. *World J Gastroenterol* 2017;23(19):3546-55. doi: 10.3748/wjg.v23.i19.3546
  48. Chang AB, Lasserson TJ, Gaffney J, et al. Gastro-oesophageal reflux treatment for prolonged non-specific cough in children and adults. *Cochrane Database Syst Rev* 2011(1):CD004823. doi: 10.1002/14651858.CD004823.pub4 [published Online First: 2011/01/21]
  49. Cohen SM, Garrett CG. Hoarseness: is it really laryngopharyngeal reflux? *Laryngoscope* 2008;118(2):363-6. doi: 10.1097/MLG.0b013e318158f72d [published Online First: 2007/11/21]
  50. Yadlapati R, Pandolfino JE, Lidder AK, et al. Oropharyngeal pH Testing Does Not Predict Response to Proton Pump Inhibitor Therapy in Patients with Laryngeal Symptoms. *Am J Gastroenterol* 2016;111(11):1517-24. doi: 10.1038/ajg.2016.145 [published Online First: 2016/11/04]
  51. Lee JH, Lee JW, An J, et al. Efficacy of non-sedating H1-receptor antihistamines in adults and adolescents with chronic cough: A systematic review. *World Allergy Organ J* 2021;14(8):100568. doi: 10.1016/j.waojou.2021.100568 [published Online First: 20210721]
  52. O'Hara J, Jones NS. The aetiology of chronic cough: a review of current theories for the otorhinolaryngologist. *J Laryngol Otol* 2005;119(7):507-14. doi: 10.1258/0022215054352207



53. Jackson-Menaldi CA, Dzul AI, Holland RW. Hidden respiratory allergies in voice users: treatment strategies. *Logoped Phoniatr Vocol* 2002;27(2):74-9. doi: 10.1080/140154302760409293
54. Sanu A, Eccles R. Postnasal drip syndrome. Two hundred years of controversy between UK and USA. *Rhinology* 2008;46(2):86-91.
55. Imoto Y, Takabayashi T, Sakashita M, et al. Combination therapy with montelukast and loratadine alleviates pharyngolaryngeal symptoms related to seasonal allergic rhinitis. *J Allergy Clin Immunol Pract* 2019;7(3):1068-70.e3. doi: 10.1016/j.jaip.2018.07.034 [published Online First: 20180810]
56. Niimi A, Matsumoto H, Mishima M. Eosinophilic airway disorders associated with chronic cough. *Pulm Pharmacol Ther* 2009;22(2):114-20. doi: 10.1016/j.pupt.2008.12.001 [published Online First: 20081216]
57. Kita T, Fujimura M, Ogawa H, et al. Antitussive effects of the leukotriene receptor antagonist montelukast in patients with cough variant asthma and atopic cough. *Allergol Int* 2010;59(2):185-92. doi: 10.2332/allergolint.09-OA-0112 [published Online First: 20100325]
58. Lin L, Chen Z, Cao Y, et al. Normal saline solution nasal-pharyngeal irrigation improves chronic cough associated with allergic rhinitis. *Am J Rhinol Allergy* 2017;31(2):96-104. doi: 10.2500/ajra.2017.31.4418
59. Miwa N, Nagano T, Ohnishi H, et al. An Open-Label, Multi-Institutional, Randomized Study to Evaluate the Additive Effect of a Leukotriene Receptor Antagonist on Cough Score in Patients with Cough-Variant Asthma Being Treated with Inhaled Corticosteroids. *Kobe J Med Sci* 2018;64(4):E134-e39. [published Online First: 20181204]
60. Yu JL, Becker SS. Postnasal drip and postnasal drip-related cough. *Curr Opin Otolaryngol Head Neck Surg* 2016;24(1):15-9. doi: 10.1097/moo.0000000000000226
61. Mincheva RK, Kralimarkova TZ, Rasheva M, et al. A real - life observational pilot study to evaluate the effects of two-week treatment with montelukast in patients with chronic cough. *Cough* 2014;10(1):2. doi: 10.1186/1745-9974-10-2 [published Online First: 20140320]
62. Hamada S, Kobayashi Y, Sakamoto D, et al. Long-term sublingual immunotherapy provides better effects for patients with Japanese cedar pollinosis. *Auris Nasus Larynx* 2021;48(4):646-52. doi: 10.1016/j.anl.2021.01.003 [published Online First: 20210129]
63. Simberg S, Sala E, Tuomainen J, et al. Vocal symptoms and allergy--a pilot study. *J Voice* 2009;23(1):136-9. doi: 10.1016/j.jvoice.2007.03.010 [published Online First: 20070712]
64. Shi G, Shen Q, Zhang C, et al. Efficacy and Safety of Gabapentin in the Treatment of Chronic Cough: A Systematic Review. *Tuberc Respir Dis (Seoul)* 2018;81(3):167-74. doi: 10.4046/trd.2017.0089 [published Online First: 2018/06/19]
65. Ryan NM, Birring SS, Gibson PG. Gabapentin for refractory chronic cough: a randomised, double-blind, placebo-controlled trial. *Lancet* 2012;380(9853):1583-9. doi: 10.1016/S0140-6736(12)60776-4 [published Online First: 2012/09/07]
66. Kirch S, Gegg R, Johns MM, et al. Globus pharyngeus: effectiveness of treatment with proton pump inhibitors and gabapentin. *Ann Otol Rhinol Laryngol* 2013;122(8):492-5. doi: 10.1177/000348941312200803
67. Bastian ZJ, Bastian RW. The use of neuralgia medications to treat sensory neuropathic cough: our experience in a retrospective cohort of thirty-two patients. *PeerJ* 2015;3:e816. doi: 10.7717/peerj.816 [published Online First: 2015/03/18]
68. Jeyakumar A, Brickman TM, Haben M. Effectiveness of amitriptyline versus cough suppressants in the treatment of chronic cough resulting from postviral vagal neuropathy. *Laryngoscope* 2006;116(12):2108-12. doi: 10.1097/01.mlg.0000244377.60334.e3 [published Online First: 2006/12/06]
69. Niimi A, Chung KF. Evidence for neuropathic processes in chronic cough. *Pulm Pharmacol Ther* 2015;35:100-4. doi: 10.1016/j.pupt.2015.10.004 [published Online First: 2015/10/18]
70. Jang M, Rubin SJ, Stein DJ, et al. Randomized double blind trial of amitriptyline versus placebo in treatment of chronic laryngopharyngeal neuropathy. *Am J Otolaryngol* 2017;38(6):683-87. doi: 10.1016/j.amjoto.2017.07.006 [published Online First: 2017/08/02]
71. Miller RH, Woodson GE, Jankovic J. Botulinum Toxin Injection of the Vocal Fold for Spasmodic Dysphonia: A Preliminary Report. *Archives of Otolaryngology-Head & Neck Surgery* 1987;113(6):603-05. doi: 10.1001/archotol.1987.01860060029009

72. Kendall KA, Leonard RJ. Interarytenoid Muscle Botox Injection for Treatment of Adductor Spasmodic Dysphonia With Vocal Tremor. *Journal of Voice* 2011;25(1):114-19. doi: 10.1016/j.jvoice.2009.08.003
73. Persaud R, Garas G, Silva S, et al. An evidence-based review of botulinum toxin (Botox) applications in non-cosmetic head and neck conditions. *JRSM Short Reports* 2013;4(2):1-9. doi: 10.1177/2042533312472115
74. Chu MW, Lieser JD, Sinacori JT. Use of Botulinum Toxin Type A for Chronic Cough: A Neuropathic Model. *Archives of Otolaryngology–Head & Neck Surgery* 2010;136(5):447-52. doi: 10.1001/archoto.2010.59
75. Cook L, Athanasiadis T. Laryngeal Botox injection in recalcitrant cases of chronic cough. *Australian Journal of Otolaryngology* 2021;4
76. Stewart SJ, Wee JO. Antireflux Surgery and Laryngopharyngeal Reflux. *Current Otorhinolaryngology Reports* 2016;4(1):63-66. doi: 10.1007/s40136-016-0104-6
77. Hessler LK, Xu Y, Shada AL, et al. Antireflux surgery leads to durable improvement in laryngopharyngeal reflux symptoms. *Surg Endosc* 2021;36(1):778-86. doi: 10.1007/s00464-020-08279-9
78. Krill JT, Naik RD, Higginbotham T, et al. Association Between Response to Acid-Suppression Therapy and Efficacy of Antireflux Surgery in Patients With Extraesophageal Reflux. *Clin Gastroenterol Hepatol* 2017;15(5):675-81. doi: 10.1016/j.cgh.2016.10.031 [published Online First: 2016/11/15]
79. Sahin M, Vardar R, Ersin S, et al. The effect of antireflux surgery on laryngeal symptoms, findings and voice parameters. *Eur Arch Otorhinolaryngol* 2015;272(11):3375-83. doi: 10.1007/s00405-015-3657-y [published Online First: 2015/06/28]
80. Westcott CJ, Hopkins MB, Bach K, et al. Fundoplication for laryngopharyngeal reflux disease. *J Am Coll Surg* 2004;199(1):23-30. doi: 10.1016/j.jamcollsurg.2004.03.022 [published Online First: 2004/06/26]
81. Carroll TL, Nahikian K, Asban A, et al. Nissen Fundoplication for Laryngopharyngeal Reflux After Patient Selection Using Dual pH, Full Column Impedance Testing: A Pilot Study. *Annals of Otolaryngology, Rhinology & Laryngology* 2016;125(9):722-28. doi: 10.1177/0003489416649974
82. Swoger J, Ponsky J, Hicks DM, et al. Surgical fundoplication in laryngopharyngeal reflux unresponsive to aggressive acid suppression: a controlled study. *Clin Gastroenterol Hepatol* 2006;4(4):433-41. doi: 10.1016/j.cgh.2006.01.011 [published Online First: 2006/04/18]
83. Snow GE, Dbouk M, Akst LM, et al. Response of Laryngopharyngeal Symptoms to Transoral Incisionless Fundoplication in Patients with Refractory Proven Gastroesophageal Reflux. *Annals of Otolaryngology, Rhinology & Laryngology* 2021;00034894211037414. doi: 10.1177/00034894211037414
